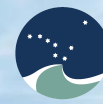

## Low levels of population genetic structure in the gilthead sea bream, *Sparus aurata*, along the coast of Italy

Paolo Franchini<sup>1,2\*,†</sup>, Luciana Sola<sup>1</sup>, Donatella Crosetti<sup>2</sup>, Valentina Milana<sup>1</sup>, and Anna Rita Rossi<sup>1</sup>

<sup>1</sup>Department of Biology and Biotechnology “C. Darwin”, University of Rome “La Sapienza”, via A. Borelli 50, 00161 Rome, Italy

<sup>2</sup>ISPRA, Istituto Superiore per la Protezione e la Ricerca Ambientale, Via di Casalotti 300, 00166 Rome, Italy

\*Corresponding Author: tel: +39 06 49918014; fax: +39 06 4457516; e-mail: [paolo.franchini@uni-konstanz.de](mailto:paolo.franchini@uni-konstanz.de)

†Present address: Lehrstuhl für Zoologie und Evolutionsbiologie, Department of Biology, University of Konstanz, Universitätstrasse 10, 78457 Konstanz, Germany.

Franchini, P., Sola, L., Crosetti, D., Milana, V., and Rossi, A. R. 2012. Low levels of population genetic structure in the gilthead sea bream, *Sparus aurata*, along the coast of Italy. – ICES Journal of Marine Science, 69: 41–50.

Received 17 December 2010; accepted 3 October 2011; advance access publication 13 November 2011.

The gilthead sea bream, *Sparus aurata*, is a coastal, commercially important fish. Contrasting results concerning the genetic structure of the species at different geographic scales have been reported. Here, an investigation is made into the population genetic structure of *S. aurata* along the coast of Italy, using samples analysed previously and material from new sampling sites (12) and using different microsatellite loci (10). One sample from the eastern Atlantic and three temporal replicates from one site were also included. The presence of a weak (overall  $F_{ST} = 0.0072$ ), but significant, genetic population subdivision was detected by *F*-statistics. Temporal replicates indicate genetic data consistency over time. Isolation by distance between the Atlantic and the coast of Italy is suggested by a Mantel test. The distributional pattern of genetic variance obtained by analysis of molecular variation reflects the geographic sampling areas, but is only partially congruent with the results obtained with fewer sites and loci. The dispersal of passive eggs/larvae by the main currents appears to contribute to shaping the gene flow. Given the intensity of sea bream aquaculture activities in Italy, the possibility that aquaculture may have partially contributed to the population genetic pattern detected cannot be excluded.

**Keywords:** Bayesian analysis, genetic structure, migration, Sparidae.

### Introduction

The levels of genetic differentiation or similarity inferred by neutral molecular markers represent a basic source of information for reconstructing the evolutionary history of a species and for depicting the actual situation in terms of genetic structure and gene flow. In marine environments, one would expect little or no genetic subdivision of a species into stocks or populations (Waples, 1998), but considerable evidence of population subdivision in marine fish species has been reported recently, even on a limited spatial scale (Hauser and Carvalho, 2008, and references therein). Moreover, in many marine fish species, the limited biological knowledge and lack of tracking experiments make it difficult to identify the mechanisms involved in the reproductive isolation. Often, it is also difficult to evaluate the extent to which genetic differentiation reflects either the influence of gene flow (past and present), genetic drift, or the degree of local adaptation (Grosberg and Cunningham, 2001). In addition, the consequences of anthropogenic practices in cultured species (e.g. stock enhancement and accidental escapes and/or gamete release from floating cages) can potentially alter the local gene pool composition and further complicate data interpretation (Perez-Enriquez *et al.*, 2001).

The gilthead sea bream, *Sparus aurata*, is a marine coastal teleost that inhabits the Mediterranean Sea and the northeastern Atlantic Ocean. It is a sedentary fish that migrates seasonally towards and from brackish coastal lagoons and estuaries for feeding and reproductive purposes, respectively. It is a highly fecund, protandrous hermaphrodite, characterized by mass-spawning behaviour and a lengthy planktonic larval stage. It is an important species for capture fisheries and a key species for large-scale Mediterranean aquaculture owing to its excellent flesh quality and rapid growth. Aquaculture production of the species in 2008 reached >132 000 t, 90% of which was in the Mediterranean Sea (FAO, 2008), and was mainly from intensive farming in hatcheries or sea cages.

As a consequence of the rise of aquaculture production, research studies on the genome of *S. aurata* increased exponentially in the past decade. Linkage (Franch *et al.*, 2006) and physical (Sarpoglou *et al.*, 2007) maps became available and, as a first step for whole-genome sequencing, the first comparative BAC map has been produced (Kuhl *et al.*, 2011), covering ~75% of the sea bream genome. However, basic information on the biology of the species is still limited, and its genetic structure

has been investigated only recently. The application of different nuclear molecular markers (allozymes, random amplified polymorphic DNAs, and microsatellites) at different geographic scales has provided ambiguous results, indicating either a weak genetic structure in the Atlantic Ocean and Mediterranean Sea (Alarcon *et al.*, 2004; De Innocentiis *et al.*, 2004; Rossi *et al.*, 2006), or a strong genetic subdivision at short distances along the Tunisian coasts (Ben Slimen *et al.*, 2004), or between the opposite coasts of the western Mediterranean (Chaoui *et al.*, 2009). The low variability of the hypervariable domain I of the mitochondrial control region is inadequate to detect genetic divergence among populations (Alarcon *et al.*, 2004). Therefore, the genetic structure is yet to be defined.

The main goal of the present study was to further the analysis of the genetic structure of *S. aurata* along the coast of Italy. For this purpose, we increased the number of microsatellite loci to ten on the same individuals (from six Italian localities and one in the Atlantic Ocean), with four loci previously investigated by our group (De Innocentiis *et al.*, 2004), and we extended the analysis on fish from six additional sampling sites. Further statistical analyses were carried out using Bayesian and coalescent approaches in addition to the classical methods (e.g. *F*-statistics) applied in the previous studies with the same markers (Alarcon *et al.*, 2004; De Innocentiis *et al.*, 2004; Chaoui *et al.*, 2009). In all, the allele size variation of ten polymorphic microsatellite loci was analysed in 15 gilthead sea bream samples (628 fish) from 12 sites along the coast of Italy and from 1 locality in the Atlantic Ocean. Three temporal replicates from one site were also included in the analysis.

In this way, we aimed to verify (i) whether the results obtained on the same samples with more loci were congruent with previous observations (De Innocentiis *et al.*, 2004) and, therefore, how the number of loci could bias the results obtained, (ii) whether an increase in the number of sampling sites better resolves the genetic structure, and (iii) how many of the data were consistent over time, and hence whether temporal replicates from the same site gave homogeneous results.

## Material and methods

### Sampling and microsatellite genotyping

In all, 628 adult gilthead sea bream, ~16–22 cm total length (corresponding to one year of age, mostly males), were collected from

12 locations along the Italian coasts in the central Mediterranean Sea and from 1 location in the Atlantic Ocean (Table 1, Figure 1). The site Lesina (Ad-L) was sampled in 3 years (Ad-L1, 2001; Ad-L2, 2007; Ad-L3, 2008) to investigate the temporal stability of genetic structure. For each fish, the distal portion of the pelvic fin was clipped and stored in 95% ethanol.

Genomic DNA was obtained from fin clips using the salting-out extraction method described by Aljanabi and Martinez (1997), then used as a template in a polymerase chain reaction (PCR) for ten microsatellite loci: *SaGT1*, *SaGT26*, *SaGT31*, and *SaGT32* (Batargias *et al.*, 1999; previously scored in some populations by De Innocentiis *et al.*, 2004); *SauG46*, *SauD69*, and *SauK140* (Launey *et al.*, 2003); and *Pb-OVI-B2*, *Pb-OVI-D102*, and *Pb-OVI-D106* (Piñera *et al.*, 2006). The PCRs were carried out in a thermocycler T1 (Biometra, Göttingen, Germany), applying the amplification conditions reported in the original studies for each primer pair. The forward primers for each locus were labelled with 5'-fluorescent dye (6-FAM, HEX, or TAMRA), and the amplified products were processed for polymorphism detection on an ABI 3730 automated sequencer. Allele sizes were screened using PEAK SCANNER v1.0 software (Applied Biosystems) by comparison with a GENESCAN 500 ROX size standard. All steps, from amplification to genotyping, were repeated for some 4% of the total samples (25 fish) to verify repeatability in microsatellite scoring.

MICRO-CHECKER v2.2.3 was used to detect null alleles and scoring errors (Van Oosterhout *et al.*, 2004).

### Genetic variability and differentiation

Deviation from Hardy–Weinberg (HW) expectations and linkage disequilibrium (LD) were tested for each locus and for each sample site, including the temporal replicates of Lesina (Ad-L), using GENEPOP v3.4 (Raymond and Rousset, 1995). The significance levels of both analyses were calculated with the Markov chain Monte Carlo (MCMC) method using 10 000 permutations, 5000 dememorization steps, and 500 batches. Bonferroni correction (Rice, 1989) was used to determine the statistical significance for the HW tests, and a false discovery rate (FDR) approach was applied for the LD significance because of the large number of multiple tests involved (Benjamini and Hochberg, 1995).

The simulation-based program POWSIM v1.2 (Ryman and Palm, 2006) was used to estimate the statistical power of the dataset in

**Table 1.** Summary of the 15 samples (from one Atlantic Ocean site and from 12 sites along the Italian coast and the Mediterranean Sea, with two additional temporal replicates from Lesina) of the gilthead sea bream (*S. aurata*).

| Sample ID | Sea/coast                           | Locality       | Geographic coordinates | Sampling date | Number of individuals |
|-----------|-------------------------------------|----------------|------------------------|---------------|-----------------------|
| At-A      | Atlantic Ocean<br>Mediterranean Sea | Gulf of Cadice | 37°07'N 06°59'E        | May 2001      | 48                    |
| Ad-U      | Adriatic Sea                        | Umago          | 45°25'N 13°30'E        | January 2004  | 48                    |
| Ad-L1     | Adriatic Sea                        | Lesina         | 41°54'N 15°26'E        | November 2001 | 48                    |
| Ad-L2     | Adriatic Sea                        | Lesina         | 41°54'N 15°26'E        | November 2007 | 39                    |
| Ad-L3     | Adriatic Sea                        | Lesina         | 41°54'N 15°26'E        | December 2008 | 31                    |
| Ad-B      | Adriatic Sea                        | Bisceglie      | 41°15'N 16°32'E        | June 2008     | 62                    |
| Si-T      | Sicily Channel                      | Trapani        | 38°01'N 12°29'E        | May 2008      | 42                    |
| Ty-B      | Tyrrhenian Sea                      | Bacoli         | 40°48'N 14°06'E        | May 1999      | 30                    |
| Ty-S      | Tyrrhenian Sea                      | Sabaudia       | 41°17'N 13°00'E        | October 2002  | 32                    |
| Ty-Z      | Tyrrhenian Sea                      | Anzio          | 41°28'N 12°35'E        | April 2008    | 48                    |
| Li-G      | Ligurian Sea                        | Genova         | 44°22'N 08°53'E        | May 2005      | 40                    |
| Ty-T      | Sardinian Coast                     | Tortoli        | 39°54'N 09°42'E        | November 2002 | 48                    |
| Sa-M      | Sardinian Coast                     | Muravera       | 39°24'N 09°38'E        | May 2004      | 32                    |
| SC-G      | Sardinian Coast                     | Santa Gilla    | 39°11'N 09°05'E        | May 1999      | 32                    |
| SS-C      | Sardinian Coast                     | Cabras         | 39°49'N 08°30'E        | November 2002 | 48                    |

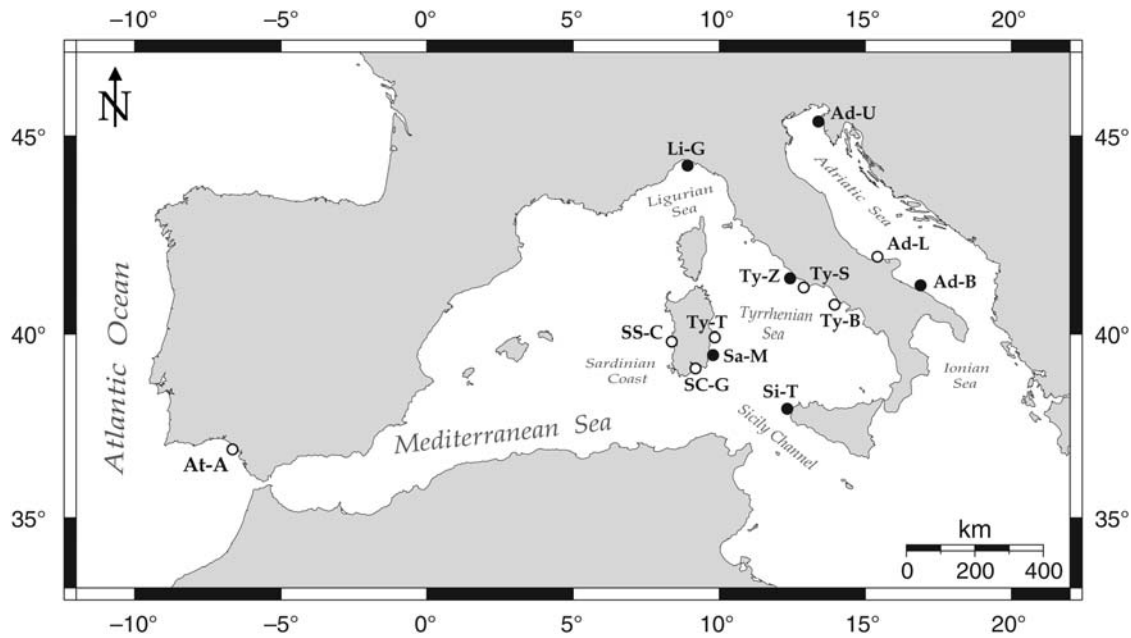

**Figure 1.** Sampling localities of *S. aurata* along the Italian coast, in the Mediterranean Sea, and in the Atlantic Ocean. Open circles, sites also examined by De Innocentiis *et al.* (2004); dots, additional sites examined in this study. Sampling localities are abbreviated as in Table 1.

detecting significant genetic differentiation. The use of POWSIM is recommended for population genetics studies when evaluating the hypothesis of genetic homogeneity. It can assess genetic homogeneity through optional combinations of the number of samples, sample sizes, and the number of loci, alleles, and allele frequencies for any hypothetical degree of true differentiation (quantified as  $F_{ST}$ ). The allele frequency of the 15 samples examined (the 13 sampling sites and the temporal replicates from Lesina) was tested for genetic homogeneity for each locus separately and for all ten loci. The statistical power of the dataset was evaluated using Chi-squared and Fisher's exact tests. The simulations were performed using different combinations of  $N_e$  (effective population size) and  $t$  (time of divergence), leading to  $F_{ST}$  values in the range 0.005–0.010. Values of  $F_{ST}$  and  $N_e$  were selected according to real values detected in this study (see Results section). Estimates of the statistical  $\alpha$  (type I) error were generated using samples drawn directly from the base population, omitting the drift steps ( $t = 0$ ) leading to the absence of differentiation ( $F_{ST} = 0$ ). The estimate of power was reported as the proportion of significant outcomes ( $p < 0.05$ ) after 1000 replicates.

The presence of the loci under selection was evaluated with a global outlier test adopting the coalescent approach developed by Beaumont and Nichols (1996), as implemented in the software LOSITAN (Antao *et al.*, 2008). Infinite alleles and stepwise mutation models were used. Additionally, the hierarchical method of Excoffier *et al.* (2009), based on the approach of Beaumont and Nichols (1996), was applied using the software ARLEQUIN v3.5 (Excoffier and Lischer, 2010). The latter method takes into account the hierarchical structure of the sample, wherein dispersal is likely to be more prevalent within the same geographic basins than between them [see analysis of molecular variation (AMOVA) structure hypotheses below]. The LOSITAN and ARLEQUIN analyses were performed by running 50 000 simulations.

The interpopulation level of genetic differentiation was calculated through  $F$ -statistics (Weir and Cockerham, 1984) using

ESTAT v2.9.3.2 (Goudet, 2001). The significance levels of  $F_{ST}$  overall loci and locus by locus for all populations were calculated with a randomization test, permuting alleles (Goudet *et al.*, 1996). The significance of pairwise  $F_{ST}$  values was calculated with the MCMC method using 10 000 permutations, 5000 dememorization steps, and 500 batches. All analyses were carried out for each of the 15 samples examined, considering the three temporal replicates of Lesina as distinct. At the Lesina site, the variance-effective population size ( $N_{eV}$ ) from the three samples collected in 2001, 2007, and 2008 was estimated with the temporal method of Waples (1989) implemented in the program NEESTIMATOR v1.3 (Peel *et al.*, 2004) and with the pseudo-maximum-likelihood algorithm implemented in the program MLNE v2.3 (Wang, 2001). As the three temporal samples consisted of fish ~1-year old, the generation time ( $g$ ) for the 2001, 2007, and 2008 replicates was set at 0, 6, and 7, respectively.

A hierarchical AMOVA, as implemented in ARLEQUIN, was performed to quantify the different genetic variance components ("among groups", "among populations within groups", "within populations"). In detail, the AMOVA was used to test the repartition of genetic variation in three different structure hypotheses: (i) the panmixia hypothesis, with a single group constituted by all 13 sampling sites; (ii) the 13 samples pooled in six groups, according to their geographic (sea/coast) origin (i.e. Atlantic Ocean, Adriatic Sea, Sicily Channel, eastern Tyrrhenian Sea, Ligurian Sea, and Sardinian coast); and (iii) the 13 samples pooled according to the five genetic assemblages proposed for gilthead sea bream by De Innocentiis *et al.* (2004). For this last hypothesis, two procedures were followed. In the first, we included only samples from the seven sites previously analysed by De Innocentiis *et al.* (2004). In the second, the complete sample set was included, considering samples from the Sicily Channel (Si-T) and from the Ligurian Sea (Li-G) as separate assemblages. The correlation between geographic and genetic distances was analysed through a Mantel test carried out by the program NTSYSPC v2.20 (Rohlf,

2005). The value  $F_{ST}/(1 - F_{ST})$  was compared with the natural logarithm of coastline distances.

### Cluster analyses

Two programs that implement the Bayesian algorithms were used to infer the population structure in the sample; neither needs an *a priori* assumption of population subdivision to infer genetic structure in a genotype dataset: STRUCTURE v2.3 (Pritchard *et al.*, 2000) and STRUCTURAMA (Huelsenbeck and Andolfatto, 2007). STRUCTURE was used to infer individual admixture and the number of populations ( $K$ ) with the highest posterior probability. The “Admixture Model” and “Allele Frequencies Correlated” were selected because these parameters are recommended for detecting genetic structure when closely related populations are involved (Falush *et al.*, 2003). Using the MCMC method, 20 replicates for each set value of  $K$  from 1 to 13 (the number of collection localities) with  $1.5 \times 10^6$  iterations and a burn-in period of  $1 \times 10^5$  iterations were performed. STRUCTURAMA, differently from STRUCTURE, calculates the posterior probability distribution of  $K$  when it is treated as a random variable. A Bayesian MCMC algorithm that implements a Dirichlet process was assumed, and the analysis was carried out with  $1.5 \times 10^6$  generations.

### Gene flow

Gene flow was estimated with a coalescent method implemented in the MIGRATE v3.03 program (Beerli and Felsenstein, 2001). The 13 samples were pooled according to structure (ii) tested by AMOVA (see above), i.e. according to the six different geographic sea/coasts to which they belonged. For each sample, the population size parameter  $\Theta$  ( $\Theta = 4N_e\mu$ , where  $N_e$  is the effective population size and  $\mu$  the mutation rate) and the pairwise migration rates  $M$  ( $M = m/\mu$ , where  $m$  is the migration rate per generation) were estimated using  $F_{ST}$  estimates and a UPGMA tree as starting parameters. The program conducted the analysis through a long chain of  $1 \times 10^6$  recorded genealogies at a sampling increment of 50 iterations, after discarding the first 10 000 as burn-in for each locus. An adaptive heating scheme using four simultaneous Markov chains was implemented to increase the search efficiency.

### Results

The genotypes for the ten microsatellite loci were determined for the 628 gilthead sea bream. The 25 fish amplified and scored twice produced identical results in each trial. It was not possible to score 2.5% of the genotypes unambiguously. The allele numbers (Supplementary Table S1) in all samples examined, the 13 sampling sites and the two additional temporal replicates of Lesina, ranged from 7 alleles for locus *SaGT31* to 37 alleles for loci *Pb-Ovi-D102* and *SaGT1*. A low variation in allele numbers among samples was observed (an average of 11.9 alleles for SC-G to 16.5 for SS-C), as also indicated by the average allele richness per sample (from 10.4 for SC-G to 11.5 for Ty-T).

After Bonferroni correction, only 3 of the 150 locus/population combinations showed a significant deviation from H–W expectation, all characterized by a heterozygote deficit (locus/population: *Pb-Ovi-D106*/Ad-B, *SauD69*/SC-G, and *SaGT32*/Si-T). LD was negligible for most samples except for population Ad-B (Adriatic Sea, Bisceglie). Indeed, after the application of the FDR approach, 19 of 45 pairs of loci showed genotyping linkage in this population. MICRO-CHECKER did not indicate the presence of null alleles or scoring errors.

**Table 2.** POWSIM simulations to assess the statistical power of microsatellite loci to differentiate populations at varying levels of expected  $F_{ST}$ , showing the results of both  $\chi^2$  and Fisher’s exact tests for the proportion of simulations out of 1000 significant with a critical value of 0.05.

| Expected $F_{ST}$ | $N_e$        | $t$     | $\chi^2$ test (%) | Fisher’s test (%) |
|-------------------|--------------|---------|-------------------|-------------------|
| 0.0005            | 1 000/5 000/ | 1/5/10  | 46.2/49.9/        | 42.4/46.1/        |
|                   | 10 000       |         | 51.1              | 46.7              |
| 0.0010            | 1 000/5 000/ | 2/10/20 | 92.3/94.1/        | 86.8/84.7/        |
|                   | 10 000       |         | 96.0              | 91.2              |
| 0.0025            | 1 000/5 000/ | 5/25/50 | 100.0/100.0/      | 100.0/100.0/      |
|                   | 10 000       |         | 100.0             | 100.0             |
| 0.0050            | 1 000/5 000/ | 10/50/  | 100.0/100.0/      | 100.0/100.0/      |
|                   | 10 000       | 100     | 100.0             | 100.0             |
| 0.0100            | 1 000/5 000/ | 20/100/ | 100.0/100.0/      | 100.0/100.0/      |
|                   | 10 000       | 200     | 100.0             | 100.0             |

The values of  $N_e$  used for the tests are based on the inferred  $N_e$  from this study (see Results section).

**Table 3.** Locus-by-locus  $F_{ST}$  values for overall populations.

| Locus              | $F_{ST}$ | Outlier <sub>(L)</sub> | Outlier <sub>(A)</sub> |
|--------------------|----------|------------------------|------------------------|
| <i>Pb-OVI-D106</i> | 0.013*** | NS                     | NS                     |
| <i>SaUK140</i>     | 0.003**  | NS                     | NS                     |
| <i>SaUG46</i>      | 0.003**  | NS                     | NS                     |
| <i>Pb-OVI-D102</i> | 0.003*   | NS                     | NS                     |
| <i>Pb-OVI-B2</i>   | 0.038*** | ***                    | ***                    |
| <i>SaUD69</i>      | 0.006*** | NS                     | NS                     |
| <i>SaGT1</i>       | 0.003**  | NS                     | NS                     |
| <i>SaGT26</i>      | 0.021*** | *                      | NS                     |
| <i>SaGT31</i>      | 0.002*   | NS                     | NS                     |
| <i>SaGT32</i>      | 0.007*** | NS                     | NS                     |

The columns Outlier<sub>(L)</sub> and Outlier<sub>(A)</sub> indicate the results of the tests for the detection of outlier loci performed by LOSITAN and ARLEQUIN, respectively. NS (not significant) refers to loci where neutrality was found. Asterisks indicate the significance of the estimators.

\* $p < 0.05$ .

\*\* $p < 0.01$ .

\*\*\* $p < 0.001$ .

The POWSIM analysis revealed that the combination of microsatellite loci and sample sizes rendered a statistical power sufficient to detect a low level of differentiation. In fact, more than 92% ( $\chi^2$ ) and 84% (Fisher’s) of the tests where the  $N_e:t$  combination led to  $F_{ST} = 0.0010$  and 100% (both  $\chi^2$  and Fisher’s) of the tests where  $N_e:t$  led to a  $F_{ST}$  value of  $\geq 0.0025$  were statistically significant (Table 2). The estimate of the statistical  $\alpha$  (type I) error varied from 0.042 with the Fisher’s exact test to 0.057 with a  $\chi^2$  test.

Locus-by-locus  $F_{ST}$  values overall populations ranged from 0.002 for locus *SaGT31* to 0.038 for locus *Pb-OVI-B2*. The  $F_{ST}$  values were significant for all loci (Table 3). The global outlier test using all 15 populations detected directional selection at two loci (*Pb-OVI-B2*,  $p < 0.001$ ; *SaGT26*,  $p < 0.05$ ) using LOSITAN under both infinite alleles and stepwise mutation models. ARLEQUIN identified only locus *Pb-OVI-B2* as an outlier ( $p < 0.001$ ). To minimize the detection of false positives, we therefore considered only locus *Pb-OVI-B2* to be under directional selection, because it was detected by both methods with high statistical support ( $p < 0.001$ ). For this reason, this locus was eliminated from subsequent analyses.

Multilocus  $F_{ST}$  estimates gave values of 0.0072 for all samples and of 0.0065 when only Mediterranean sites were included.



**Table 4.**  $F_{ST}$  values for each pair of samples, with significant differences shown emboldened (105 multiple tests, corrected threshold via the Bonferroni procedure:  $p < 0.0004$ ).

|              | At-A          | Ad-U          | Ad-L 1        | Ad-L 2        | Ad-L 3        | Ad-B   | Si-T          | Ty-B    | Ty-S          | Ty-Z          | Li-G   | Ty-T   | Sa-M   | SC-G          |
|--------------|---------------|---------------|---------------|---------------|---------------|--------|---------------|---------|---------------|---------------|--------|--------|--------|---------------|
| <b>Ad-U</b>  | <b>0.0144</b> | –             |               |               |               |        |               |         |               |               |        |        |        |               |
| <b>Ad-L1</b> | <b>0.0128</b> | 0.0055        | –             |               |               |        |               |         |               |               |        |        |        |               |
| <b>Ad-L2</b> | 0.0079        | 0.0025        | 0.0072        | –             |               |        |               |         |               |               |        |        |        |               |
| <b>Ad-L3</b> | <b>0.0092</b> | <b>0.0134</b> | 0.0067        | 0.0075        | –             |        |               |         |               |               |        |        |        |               |
| <b>Ad-B</b>  | <b>0.0106</b> | 0.0069        | 0.0074        | 0.0054        | 0.0072        | –      |               |         |               |               |        |        |        |               |
| <b>Si-T</b>  | <b>0.0120</b> | <b>0.0109</b> | <b>0.0128</b> | <b>0.0081</b> | <b>0.0091</b> | 0.0064 | –             |         |               |               |        |        |        |               |
| <b>Ty-B</b>  | <b>0.0164</b> | 0.0005        | 0.0062        | 0.0027        | 0.0100        | 0.0034 | <b>0.0086</b> | –       |               |               |        |        |        |               |
| <b>Ty-S</b>  | <b>0.0119</b> | 0.0027        | 0.0094        | 0.0032        | <b>0.0152</b> | 0.0029 | <b>0.0099</b> | –0.0012 | –             |               |        |        |        |               |
| <b>Ty-Z</b>  | <b>0.0115</b> | 0.0050        | 0.0079        | 0.0038        | 0.0108        | 0.0052 | 0.0044        | 0.0024  | 0.0028        | –             |        |        |        |               |
| <b>Li-G</b>  | <b>0.0129</b> | 0.0030        | <b>0.0072</b> | 0.0043        | <b>0.0139</b> | 0.0050 | 0.0097        | 0.0000  | –0.0022       | 0.0030        | –      |        |        |               |
| <b>Ty-T</b>  | <b>0.0088</b> | 0.0047        | 0.0080        | 0.0014        | 0.0086        | 0.0017 | <b>0.0073</b> | 0.0029  | 0.0007        | 0.0035        | 0.0030 | –      |        |               |
| <b>Sa-M</b>  | 0.0079        | 0.0104        | <b>0.0165</b> | 0.0040        | 0.0118        | 0.0042 | 0.0051        | 0.0056  | 0.0015        | 0.0046        | 0.0034 | 0.0034 | –      |               |
| <b>SC-G</b>  | <b>0.0207</b> | 0.0139        | 0.0081        | <b>0.0139</b> | <b>0.0201</b> | 0.0108 | <b>0.0104</b> | 0.0101  | <b>0.0118</b> | <b>0.0106</b> | 0.0082 | 0.0099 | 0.0119 | –             |
| <b>SS-C</b>  | <b>0.0117</b> | 0.0047        | <b>0.0114</b> | 0.0033        | <b>0.0114</b> | 0.0055 | 0.0051        | 0.0053  | 0.0033        | 0.0025        | 0.0063 | 0.0038 | 0.0012 | <b>0.0162</b> |

**Table 5.** Temporal estimates of  $N_e$  calculated from the microsatellite loci for both the Waples moment and MLNE methods, with associated 95% confidence intervals.

| Temporal comparison | Years     | Waples moment $N_e$ | –95%  | +95%   | MLNE $N_e$ | –95% | +95%   |
|---------------------|-----------|---------------------|-------|--------|------------|------|--------|
| Ad-L1 vs. Ad-L2     | 2001–2007 | 374.3               | 184.0 | 1454.8 | 243.3      | 53.9 | 10 000 |
| Ad-L1 vs. Ad-L3     | 2001–2008 | 652.1               | 229.8 | ∞      | 202.4      | 44.1 | 10 000 |
| Ad-L2 vs. Ad-L3     | 2007/2008 | 104.9               | 27.6  | 1349.2 | 177.1      | 33.9 | 10 000 |

When population pairs were analysed (Table 4), significant  $F_{ST}$  values were obtained in 32 of the 105 pairwise comparisons (Bonferroni correction applied). Most of the significant comparisons involved the Atlantic, At-A, and the Sicilian, Si-T, samples.

Analyses of the three temporal replicates collected in Lesina (Ad-L1, Ad-L2, and Ad-L3) revealed homogeneity among them. Indeed, expected and observed heterozygosity, the absence of LD at all loci combinations, and non-significant pairwise  $F_{ST}$  values were observed. Moreover, homogeneity in effective size was detected in pairwise comparisons (Table 5). The Waples moment method (Waples, 1989) gave a wider range of mean  $N_e$  estimates than the MLNE method (Wang, 2001), but the two methods yielded overlapping 95% confidence intervals (CIs).

In light of these results, to have data comparable with those from previous investigations (De Innocentiis *et al.*, 2004) and to ensure sample-size homogeneity, only the temporal replicate Ad-L1, the same used by De Innocentiis *et al.* (2004), was included in further analyses of genetic structure and gene flow.

The AMOVA (Table 6) showed significant genetic differentiation within the whole sample set when the panmixia hypothesis was tested, although most genetic variation was explained by the “within populations” hierarchical level (99.59%). When genetic structuring of geographic source areas was tested (six groups: Atlantic Ocean, Adriatic Sea, Sicily Channel, eastern Tyrrhenian Sea, Ligurian Sea, and Sardinian coast), microsatellite loci explained significant molecular variance at the “among groups” level and non-significant variance at the “among populations within groups” level. The hypothesis that genetic variation was structured according to the genetic assemblages proposed by De Innocentiis *et al.* (2004) was not supported by the AMOVA, either when only the same individuals from seven sampling localities (five groups hypothesis) therein analysed were considered or when the complete sample set (5 + 2 groups) was included.

The Mantel test applied to all sample sites revealed the presence of correlation between genetic, expressed as  $F_{ST}$ , and geographic

distances ( $r = 0.37$ ,  $p = 0.046$ ; Figure 2). Excluding the Atlantic population (At-A) from the analyses, however, there was no correlation within the Mediterranean Sea populations ( $r = 0.12$ ,  $p = 0.193$ ).

Clustering analyses by STRUCTURE identified the greatest posterior probability value at  $K = 1$  (a single genetic cluster) of the 13 tested  $K$  (Figure 3). This is supported by the symmetric proportion of the sample assigned to all populations ( $P = 1/K$ ) in which individuals showed comparable assignment probabilities for all different inferred  $K$  clusters. The greatest partition probability was found at  $K = 1$  ( $P = 0.99$ ) also by STRUCTURAMA, where the  $K$  number of populations was not specified *a priori*.

The estimates of the population size parameter ( $\Theta$ ), the migration rate ( $M$ ), and the effective population size ( $N_e$ ), calculated assuming a microsatellite mutation rate of  $10^{-4}$  per locus per generation (Whittaker *et al.*, 2003), are listed in Table 7.  $N_e$  values ranged from 2450 gilthead sea bream for the Sicily Channel to 8025 for the Ligurian Sea (Table 7). Gene flow between many of the assemblages is limited, but in some cases, the values of  $M$  indicated high outcoming and low incoming gene flow (or vice versa; Table 7). The asymmetric gene flow is confirmed by the one-way ANOVA applied to test the null hypothesis of equal immigration rate among samples ( $p < 0.01$ ). The greatest difference in gene-flow direction was in comparisons involving the Adriatic Sea, which estimated substantial gene flow towards all other Mediterranean sites and low incoming flow from all of them. For the Atlantic site, low gene flow in both directions was observed with all the Mediterranean sites, except the consistent incoming gene flow from the Sardinian coast ( $M = 42.11$ ).

## Discussion

The results of the study revealed a high level of genetic variability in gilthead sea bream. Allelic polymorphism and expected heterozygosity values are comparable with those observed in *S. aurata* and other sparids (Batargias *et al.*, 1999; Perez-Enriquez *et al.*,

**Table 6.** AMOVA hierarchical analysis examining the partitioning of genetic variance at three hierarchical levels (“among groups”, “among populations within groups”, and “within populations”) in different hypothesized structures (see text), with significant genetic variations indicated by emboldened  $p$ -values.

| Structure tested                                                                                                              | Degree of freedom | Variation (%) | $F$ -statistic     | $p$ -value  |
|-------------------------------------------------------------------------------------------------------------------------------|-------------------|---------------|--------------------|-------------|
| One group                                                                                                                     |                   |               |                    |             |
| Among populations                                                                                                             | 12                | 0.75          | $F_{ST} = 0.0034$  | <b>0.00</b> |
| Within populations                                                                                                            | 1 103             | 99.25         |                    |             |
| Six groups: (At-A) vs. (Ad-U, Ad-L, Ad-B) vs. (Si-T) vs. (Ty-B, Ty-S, Ty-Z) vs. (Li-G) vs. (Ty-T, Sa-M, SC-G, SS-C)           |                   |               |                    |             |
| Among groups                                                                                                                  | 5                 | 0.45          | $F_{CT} = 0.0045$  | <b>0.03</b> |
| Among populations within groups                                                                                               | 7                 | -0.04         | $F_{SC} = -0.0004$ | 0.51        |
| Within populations                                                                                                            | 1 103             | 99.59         | $F_{ST} = 0.0040$  | <b>0.00</b> |
| Five groups (structure tested by De Innocentiis et al., 2004): (At-A) vs. (Ad-L) vs. (Ty-B, Ty-S, Ty-T) vs. (SC-G) vs. (SS-C) |                   |               |                    |             |
| Among groups                                                                                                                  | 4                 | 0.09          | $F_{CT} = 0.0009$  | 0.43        |
| Among populations within groups                                                                                               | 2                 | 0.11          | $F_{SC} = 0.0011$  | 0.41        |
| Within populations                                                                                                            | 565               | 99.80         | $F_{ST} = 0.0020$  | <b>0.01</b> |
| 5 + 2 groups: (At-A) vs. (Ad-U, Ad-L, Ad-B) vs. (Ty-B, Ty-S, Ty-T, Ty-Z, Sa-M) vs. (SC-G) vs. (SS-C) vs. (Si-T) vs. (Li-G)    |                   |               |                    |             |
| Among groups                                                                                                                  | 6                 | -0.13         | $F_{CT} = -0.0012$ | 0.64        |
| Among populations within groups                                                                                               | 6                 | 0.45          | $F_{SC} = 0.0044$  | <b>0.00</b> |
| Within populations                                                                                                            | 1 103             | 99.68         | $F_{ST} = 0.0031$  | <b>0.00</b> |

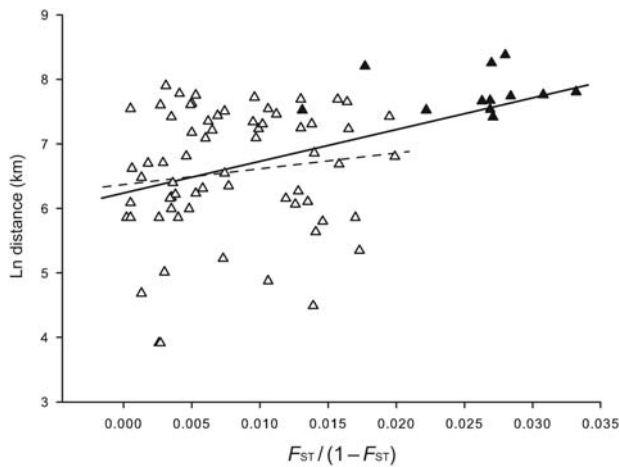

**Figure 2.** Genetic distances in gilthead sea bream populations inferred from multilocus estimates of  $F_{ST}$  plotted against geographic distance. The pairwise comparisons involving samples from the Mediterranean Sea and the Atlantic Ocean are indicated by solid triangles and those involving exclusively samples from the Mediterranean Sea by open triangles. Solid regression lines interpolate comparisons for all samples and dashed regression lines for Mediterranean Sea samples.

2001; Jeong et al., 2003; Alarcon et al., 2004; De Innocentiis et al., 2004; Chaoui et al., 2009) as well as in other marine and anadromous teleosts (DeWoody and Avise, 2000).

Physical linkage of loci appears to be unlikely because a substantial level of disequilibrium was only recorded in 1 population of the 15 analysed. The disequilibrium observed at the Adriatic site Bisceglie (Ad-B) may indicate population subdivision as a result of the mixing of distinct populations/broodstocks/generations (Hartl and Clark, 1997). Indeed, the Bisceglie coast is characterized by massive presence of floating cages for aquaculture, and frequent escapes have been documented (CoProMar, pers. comm.). As cultured sea bream show reduced variability (Karaiskou et al., 2009; Porta et al., 2010; Loukovitis et al., 2011) that could also have been obtained by allochthonous breeders (Porta et al., 2010), their accidental release may have altered allelic frequencies of the local wild genetic assemblage. However,

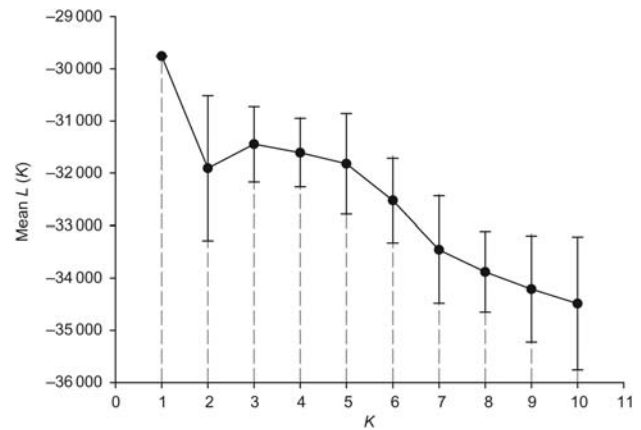

**Figure 3.** Number of gilthead sea bream populations with the greatest posterior probability expressed as the mean likelihood ( $L$ ) over 20 runs for each of the 13 inferred  $K$  (the highest  $K$  value was set as the number of sampling sites).

the homogeneity detected among the three temporal replicates from Lesina supports previous evidence, based on a lower number of microsatellite loci (Rossi et al., 2009), excluding chaotic variation in gene frequencies over time in gilthead sea bream when human intervention is absent.

### Population structure

The POWSIM simulations, carried out with different combinations of effective population size ( $N_e$ ) and time ( $t$ ) since divergence, demonstrated that the microsatellite loci screened in this study provided sufficient statistical power to detect a low level of genetic structure ( $F_{ST} = 0.001$ ) in the sample set.

The  $F_{ST}$  estimates here are lower than those obtained with the same markers by both De Innocentiis et al. (2004) and Alarcon et al. (2004), but do indicate a weak but still well-defined genetic structure along the Italian coast. However, the Bayesian analyses depict a different scenario and lean towards the lack of any population subdivision. Hence, the questions arise whether, in a situation of weak genetic structuring, the  $F$ -statistics are more

**Table 7.** Bayesian inference estimates of mean values of the population size parameter  $\Theta$  (emboldened on the diagonal) and the scaled migration rate,  $M$  (reported as the mean  $M$  value) for the Mediterranean (Adriatic Sea: Ad-U, Ad-L, Ad-B; Sicily Channel: Si-T; Tyrrhenian Sea: Ty-B, Ty-S, Ty-Z; Ligurian Sea: Li-G; Sardinian Coast: Ty-T, Sa-M, SC-G, SS-C) and the Atlantic Ocean assemblages identified by AMOVA.

| Site              | Mediterranean Sea |              |                |                |              |                 | $N_e$ |
|-------------------|-------------------|--------------|----------------|----------------|--------------|-----------------|-------|
|                   | Atlantic Ocean    | Adriatic Sea | Sicily Channel | Tyrrhenian Sea | Ligurian Sea | Sardinian Coast |       |
| Atlantic Ocean    | <b>1.46</b>       | 5.67         | 5.43           | 8.06           | 5.29         | 42.11           | 3 650 |
| Mediterranean Sea |                   |              |                |                |              |                 |       |
| Adriatic Sea      | 5.13              | <b>1.58</b>  | 5.21           | 6.32           | 5.05         | 13.15           | 3 950 |
| Sicily Channel    | 9.78              | 51.32        | <b>0.98</b>    | 32.23          | 14.20        | 59.93           | 2 450 |
| Tyrrhenian Sea    | 8.56              | 32.90        | 11.84          | <b>1.76</b>    | 7.25         | 43.01           | 4 400 |
| Ligurian Sea      | 7.01              | 22.22        | 5.91           | 69.38          | <b>3.21</b>  | 61.37           | 8 025 |
| Sardinian Coast   | 9.19              | 19.92        | 8.55           | 42.06          | 4.95         | <b>2.12</b>     | 5 300 |

Rows and columns represent recipient and donor populations, respectively.  $N_e$  was calculated assuming  $\mu = 10^{-4}$  per locus per generation.

sensitive than the Bayesian methods or, alternatively, whether they overestimate the real genetic differentiation between groups of individual fish. It is difficult to distinguish between these two possibilities. Bayesian clustering methods have the unchallenged advantage of requiring just the individual genotype and no reference to sample origin or *a priori* grouping of individuals in populations (Pritchard *et al.*, 2000). Nevertheless, Latch *et al.* (2006) demonstrated that their performances depend on the levels of population differentiation. Indeed, in the presence of low  $F_{ST}$  values ( $\leq 0.02$ ), different programs applying these methods not only fail to identify the real number of subpopulations, but also provide false certainty (extremely high probability values) regarding the number of inferred  $K$ . The overall  $F_{ST}$  value (0.0072) estimated here is an order of magnitude lower than the  $F_{ST}$  threshold indicated by Latch *et al.* (2006). Hence, the single panmictic population suggested by the Bayesian clustering methods appears to be incorrectly identified, and the real genetic structure of gilthead sea bream is more reliably reflected by the results based on  $F_{ST}$  estimates, i.e. a (weak) population subdivision in the species.

Comparison of the Italian and Atlantic samples indicates that the latter comprise the most divergent population, consistent with previous observations by De Innocentiis *et al.* (2004). When applied to the complete dataset, the Mantel test performed using the pairwise  $F_{ST}$  values provides a significant correlation with geographic distance. However, no correlation was found when At-A is excluded from the analysis. This could be explained considering an isolation-by-distance model between the Atlantic Ocean and the Italian coast, a model not identifiable in the study of De Innocentiis *et al.* (2004) carried out with four of the ten loci analysed here.

The present study was carried out with an increased number of microsatellite loci (10 vs. 4) and has a greater spatial coverage of sampling (12 vs. 6 sites) along the Italian coast, compared with the previous study of De Innocentiis *et al.* (2004). The patterns of subdivision of the two studies are only partially congruent. AMOVA, based on four loci, identified four subpopulations (Sardinian Sea, Sardinian Channel, Tyrrhenian Sea, and Adriatic Sea) from six sites (De Innocentiis *et al.*, 2004). However, the same structure was not statistically significant when AMOVA was applied to the same fish from the same six sites based on a total of ten loci. The AMOVA applied to the complete dataset identified five assemblages along the Italian coast (in addition to the sixth Atlantic assemblage) and that all samples from Sardinia, including those from Ty-T previously (De Innocentiis *et al.*, 2004) included in the Tyrrhenian group, gather within the same assemblage

(Sardinian coast). Therefore, for gilthead sea bream, data from a reduced number of microsatellite loci, although sensitive enough to detect a weak genetic structure, appear not to be representative of the real molecular variance within and between populations.

The increase in sampling coverage here better resolved genetic structure, which is likely to have been shaped by marine currents (see below) and allows us to conclude that at the medium geographic scale, genetic subdivision along the Italian coast is weak.

Framing these data into results obtained for gilthead sea bream from other sites of the species' distribution, the strong genetic subdivision found at short distances along the Tunisian coasts (Ben Slimen *et al.*, 2004) or between the French and the Algerian coasts (Chaoui *et al.*, 2009) is intriguing. Ben Slimen *et al.* (2004) used different markers, allozymes, to analyse genetic differentiation. Notwithstanding, allozymes have been used previously on some of the samples analysed here (Rossi *et al.*, 2006) and provided results consistent with results obtained using microsatellites. Chaoui *et al.* (2009) used microsatellites and random amplified polymorphic DNA and found an overall  $F_{ST}$  value of 0.069, indicating strong genetic differentiation between the two western banks of the Mediterranean Sea.

### Gene flow

Data on migration rates were obtained on a non-homogenous sample size collected over a long timespan, so the results of this analysis have to be taken with caution. Nevertheless, according to the  $M$  values calculated, the estimated gene flow between the six assemblages of gilthead sea bream are of the same order of magnitude as those observed in pelagic fish such as sardine, *Sardina pilchardus* (Gonzalez and Zardoya, 2007), and bigeye tuna, *Thunnus obesus* (Gonzalez *et al.*, 2008). The estimates indicate migration between the selected assemblages, and in some cases, it is asymmetrical.

Along the Italian coast, the pattern of gene flow appears to be compatible with the main currents characterizing water circulation (Figure 4). As an example, the outgoing gene flow from the Adriatic Sea mirrors the direction of the currents that move water towards the western Mediterranean, where the other four samples are located. At the same time, it is not surprising that no immigration is directed from these towards the Adriatic Sea, which mainly receives water from the eastern Mediterranean, where no gilthead sea bream samples were collected. In a similar way, the asymmetry of gene flow could be explained between gilthead sea bream from the Tyrrhenian and Ligurian seas.

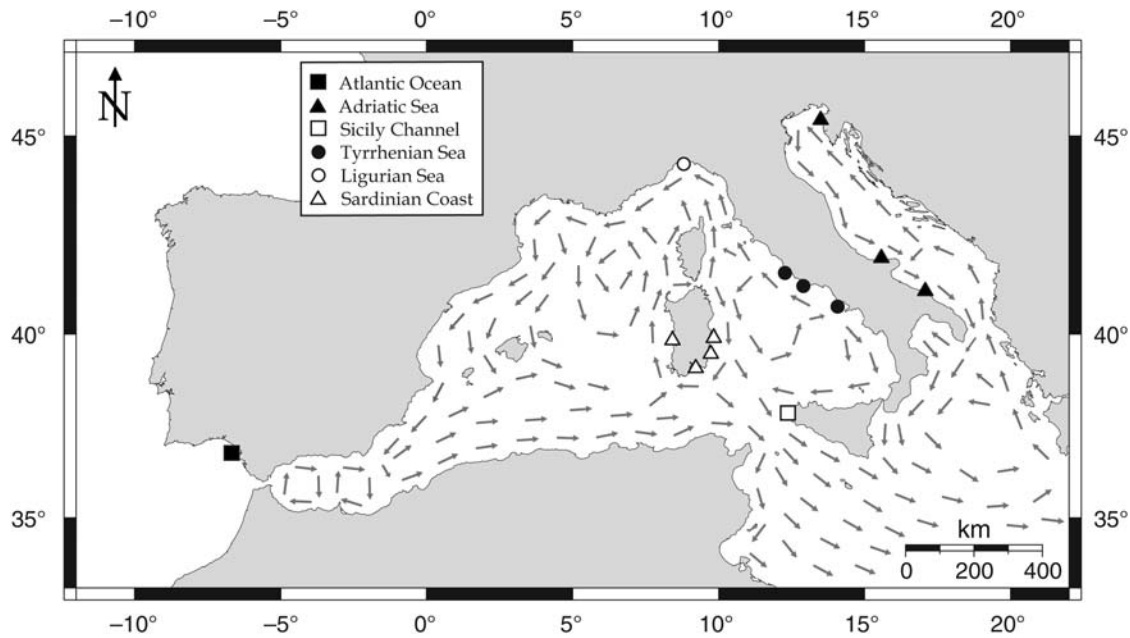

**Figure 4.** Representation of the main sea currents in the central and western Mediterranean Sea. Sampling sites symbols refer to the six assemblages identified by AMOVA.

Unfortunately, little is known about the biology of the gilthead sea bream, and the dispersal capability or territoriality of juvenile/adult individuals cannot be quantified because of the lack of tracking experiments. For this reason, it is not possible to estimate the contribution of adult gilthead sea bream active migration, if any, to the observed pattern of gene flow. However, the congruence between migration estimates and marine currents within the Mediterranean Sea suggests a key role for passive dispersal of eggs and larvae in shaping gene flow, compatible with the long-lasting larval stage of the gilthead sea bream (~50 d). Similar results of a principal contribution of larval dispersal on gene flow were recently observed in another coastal sparid, *Chrysoblephus laticeps* (Teske et al., 2010). Water circulation and larval dispersal, however, does not allow direct interpretation of either the migration pattern between the Atlantic and the Sardinian assemblages or the genetic subdivision found along the Tunisian coast by Ben Slimen et al. (2004) or between the French and Algerian coasts by Chaoui et al. (2009).

The effective population size estimated by the coalescent method gave high mean values of  $T$ , comparable with the recently published estimates of  $N_e$  for Adriatic Sea wild samples (Loukovitis et al., 2011). However, when we tried to infer  $N_e$  from the three Lesina temporal replicates, we obtained smaller mean values than those estimated with the coalescent method. Nevertheless, the few fish in each temporal sample and the short period between replicates might have affected the estimation of  $N_e$  in temporal methods, as also revealed by the large CIs (Luikart and Cornuet, 1999).

### Management implications and perspectives

*Sparus aurata* is an important aquaculture species throughout its distribution. Its culture has increased exponentially in the past 25 years (FAO, 2008). Intensification of rearing in the absence of an appropriate control of broodstock origin and history, associated with the extensive exchange of breeders and fry between

hatcheries, may already have caused a mixture of different genetic pools. In addition to restocking with hatchery fry in natural lagoons, an input of farmed fish into the wild could have been caused by accidental releases from sea cages. Indeed, in cases of accidental escapes, massive numbers of fish enter the wild. Moreover, the longer culture period adopted in the past decade to address the market requirement for larger fish caused the release of gametes by gilthead sea bream spawners from the cages to the marine system (Dimitriou et al., 2007). The impact of these activities on wild gilthead sea bream populations remains to be quantified (Sola et al., 2007). However, it is worth emphasizing that, given the intensity of sea bream aquaculture activity in Italy, aquaculture may already have partially contributed to wild population homogenization, i.e. aquaculture may be the factor that best explains current population patterns. However, all studies carried out so far on the population genetics of the species still cover a limited area of its distribution. Further studies need to be carried out at different geographic scales and over time to provide a more general picture, to permit distinction between micro-evolutionary processes and domestication effects. In this sense, *S. aurata* may become a model species for evaluating the genetic impact of aquaculture on wild populations.

Finally, it needs to be emphasized that this study was performed applying neutral genetic markers, as in most population genetics studies involving marine fish in recent years. As gene flow is expected to hamper adaptive population divergence, molecular markers with presumably neutral functional meaning indicate that local adaptations may be rare or absent in marine fish. There is now increasing interest in studying adaptive genetic variation (Luikart et al., 2003; Nielsen et al., 2009) and in identifying molecular genetic markers under selection (e.g. Joost et al., 2007). For this purpose, genome-wide datasets, which can improve the inference of population parameters and provide a better understanding of adaptive evolution (Luikart et al., 2003), are suggested for future study.



## Supplementary material

A table (Table S1) of allele frequencies, observed ( $H_o$ ) and expected ( $H_e$ ) heterozygosities, and number of alleles ( $n$ ) for the ten microsatellite loci for each population is provided at the ICESJMS online version of this manuscript.

## Acknowledgements

Financial support for this work was provided by the Italian Ministry of Instruction, University and Research (MIUR), and POR Puglia. We thank all those who helped in the collection of gilthead sea bream: A. Santulli (University of Palermo), M. Rampacci (A.Ge.I., Rome), M. Vacchi (ISPRA, Genoa), R. Vaccarella (Provincia di Bari), and E. Rambaldi (COIPA, Rome).

## References

- Alarcon, J. A., Magoulas, A., Georgakopoulos, T., Zouros, E., and Alvarez, M. C. 2004. Genetic comparison of wild and cultivated European populations of the gilthead sea bream (*Sparus aurata*). *Aquaculture*, 230: 65–80.
- Aljanabi, S. M., and Martinez, I. 1997. Universal and rapid salt-extraction of high quality genomic DNA for PCR-based techniques. *Nucleic Acids Research*, 25: 4692–4693.
- Antao, T., Lopes, A., Lopes, R. J., Beja-Pereira, A., and Luikart, G. 2008. LOSITAN: a workbench to detect molecular adaptation based on a FST-outlier method. *BMC Bioinformatics*, 9: 323.
- Batargias, C., Dermitzakis, E., Magoulas, A., and Zouros, E. 1999. Characterization of six polymorphic microsatellite markers in gilthead seabream, *Sparus aurata* (Linnaeus 1758). *Molecular Ecology*, 8: 897–898.
- Baumont, M. A., and Nichols, R. A. 1996. Evaluating loci for use in the genetic analysis of population structure. *Proceedings of the Royal Society of London, Series B: Biological Sciences*, 263: 1619–1626.
- Beerli, P., and Felsenstein, J. 2001. Maximum likelihood estimation of a migration matrix and effective population sizes in  $n$  subpopulations by using a coalescent approach. *Proceedings of the National Academy of Sciences of the USA*, 98: 4563–4568.
- Ben Slimen, H., Guerbej, H., Ben Othmen, A., Brahim, I. O., Blel, H., Chatti, N., El Abed, A., et al. 2004. Genetic differentiation between populations of gilthead seabream (*Sparus aurata*) along the Tunisian coast. *Cybium*, 28: 45–50.
- Benjamini, Y., and Hochberg, Y. 1995. Controlling the false discovery rate: a practical and powerful approach to multiple testing. *Journal of the Royal Statistical Society, Series B: Methodological*, 57: 289–300.
- Chaoui, L., Hichem Kara, M., Quignard, J. P., Faure, E., and Bonhomme, F. 2009. Forte différenciation génétique de la daurade *Sparus aurata* (L., 1758) entre les deux rives de la Méditerranée occidentale. *Comptes Rendus Biologies*, 332: 329–335.
- De Innocentiis, S., Lesti, A., Livi, S., Rossi, A. R., Crossetti, D., and Sola, L. 2004. Microsatellite markers reveal population structure in gilthead sea bream *Sparus auratus* from the Atlantic Ocean and Mediterranean Sea. *Fisheries Science*, 70: 852–859.
- DeWoody, J. A., and Avise, J. C. 2000. Microsatellite variation in marine, freshwater and anadromous fishes compared with other animals. *Journal of Fish Biology*, 56: 461–473.
- Dimitriou, E., Katselis, G., Moutopoulos, D. K., Akovitiotis, C., and Koutsikopoulos, C. 2007. Possible influence of reared gilthead sea bream (*Sparus aurata*, L.) on wild stocks in the area of the Messolonghi lagoon (Ionian Sea, Greece). *Aquaculture Research*, 38: 398–408.
- Excoffier, L., Hofer, T., and Foll, M. 2009. Detecting loci under selection in a hierarchically structured population. *Heredity*, 103: 285–298.
- Excoffier, L., and Lischer, H. E. L. 2010. Arlequin suite ver 3.5: a new series of programs to perform population genetics analyses under Linux and Windows. *Molecular Ecology Resources*, 10: 564–567.
- Falush, D., Stephens, M., and Pritchard, J. K. 2003. Inference of population structure using multilocus genotype data: linked loci and correlated allele frequencies. *Genetics*, 164: 1567–1587.
- FAO. 2008. FishStat. <http://www.fao.org/fishery/statistics/software/fishstat/en>.
- Franch, R., Louro, B., Tsalavouta, M., Chatziplis, D., Tsigenopoulos, C. S., Sarropoulou, E., Antonello, J., et al. 2006. A genetic linkage map of the hermaphrodite teleost fish *Sparus aurata* L. *Genetics*, 174: 851–861.
- Gonzalez, E. G., Beerli, P., and Zardoya, R. 2008. Genetic structuring and migration patterns of Atlantic bigeye tuna, *Thunnus obesus* (Lowe, 1839). *BMC Evolutionary Biology*, 8. doi:10.1186/1471-2148-8-252.
- Gonzalez, E. G., and Zardoya, R. 2007. Relative role of life-history traits and historical factors in shaping genetic population structure of sardines (*Sardina pilchardus*). *BMC Evolutionary Biology*, 7. doi:10.1186/1471-2148-7-197.
- Goudet, J. 2001. FSTAT, a program to estimate and test gene diversities and fixation indices (version 2.9.3). Institut d'Écologie Université de Lausanne, Lausanne, Switzerland.
- Goudet, J., Raymond, M., De Meeus, T., and Rousset, F. 1996. Testing differentiation in diploid populations. *Genetics*, 144: 1933–1940.
- Grosberg, R., and Cunningham, C. W. 2001. Genetic structure in the sea: from populations to communities. *In Marine Community Ecology*, pp. 61–84. Ed. by M. D. Bertness, S. Gaines, and M. E. Hay. Sinauer Associates, Sunderland, MA.
- Hartl, D. L., and Clark, A. G. 1997. *Principles of Population Genetics*, 3rd edn. Sinauer Associates, Sunderland, MA. 542 pp.
- Hauser, L., and Carvalho, G. R. 2008. Paradigm shifts in marine fisheries genetics: ugly hypotheses slain by beautiful facts. *Fish and Fisheries*, 9: 333–362.
- Huelsenbeck, J. P., and Andolfatto, P. 2007. Inference of population structure under a Dirichlet process model. *Genetics*, 175: 1787–1802.
- Jeong, D. S., Umino, T., Kuroda, K., Hayashi, M., Nakagawa, H., Kang, J. C., Morishima, K., et al. 2003. Genetic divergence and population structure of black sea bream *Acanthopagrus schlegelii* inferred from microsatellite analysis. *Fisheries Science*, 69: 896–902.
- Joost, S., Bonin, A., Bruford, M. W., Despres, L., Conord, C., Erhardt, G., and Taberlet, P. 2007. A spatial analysis method (SAM) to detect candidate loci for selection: towards a landscape genomics approach to adaptation. *Molecular Ecology*, 16: 3955–3969.
- Karaiskou, N., Triantafyllidis, A., Katsares, V., Abatzopoulos, T. J., and Triantaphyllidis, C. 2009. Microsatellite variability of wild and farmed populations of *Sparus aurata*. *Journal of Fish Biology*, 74: 1816–1825.
- Kuhl, H., Sarropoulou, E., Tine, M., Kotoulas, G., Magoulas, A., and Reinhardt, A. 2011. A comparative BAC Map for the gilthead sea bream (*Sparus aurata* L.). *Journal of Biomedicine and Biotechnology*, doi:10.1155/2011/329025.
- Latch, E. K., Dharmarajan, G., Glaubitz, J. C., and Rhodes, O. E. 2006. Relative performance of Bayesian clustering software for inferring population substructure and individual assignment at low levels of population differentiation. *Conservation Genetics*, 7: 295–302.
- Launey, S., Krieg, F., Haffray, P., Bruant, J. S., Vanniers, A., and Guyomard, R. 2003. Twelve new microsatellite markers for gilthead seabream (*Sparus aurata* L.): characterization, polymorphism and linkage. *Molecular Ecology Notes*, 3: 457–459.
- Loukovitis, D., Sarropoulou, E., Vogiatzi, E., Tsigenopoulos, C. S., Kotoulas, G., Magoulas, A., and Chatziplis, D. 2011. Genetic variation in farmed populations of the gilthead sea bream

- Sparus aurata* in Greece using microsatellite DNA markers. *Aquaculture Research*, doi:10.1111/j.1365-2109.2011.02821.x.
- Luikart, G., and Cornuet, J. M. 1999. Estimating the effective number of breeders from heterozygote excess in progeny. *Genetics*, 151: 1211–1216.
- Luikart, G., England, P. R., Tallmon, D., Jordan, S., and Taberlet, P. 2003. The power and promise of population genomics: from genotyping to genome typing. *Nature Reviews Genetics*, 4: 981–994.
- Nielsen, E. E., Hemmer-Hansen, J., Larsen, P. F., and Bekkevold, D. 2009. Population genomics of marine fishes: identifying adaptive variation in space and time. *Molecular Ecology*, 18: 3128–3150.
- Peel, D., Ovenden, J. R., and Peel, S. L. 2004. *NEESTIMATOR*: software for estimating effective population size, version 1.3. Queensland Government, Department of Primary Industries and Fisheries.
- Perez-Enriquez, R., Takemura, M., Tabata, K., and Taniguchi, N. 2001. Genetic diversity of red sea bream *Pagrus major* in western Japan in relation to stock enhancement. *Fisheries Science*, 67: 71–78.
- Piñera, J. A., Bernardo, D., Blanco, G., Vazquez, E., and Sanchez, J. A. 2006. Isolation and characterization of polymorphic microsatellite markers in *Pagellus bogaraveo*, and cross-species amplification in *Sparus aurata* and *Dicentrarchus labrax*. *Molecular Ecology Notes*, 6: 33–35.
- Porta, J., Porta, M. J., Bejar, J., and Alvarez, C. 2010. Development of a microsatellite multiplex genotyping tool for the fish gilthead sea bream (*Sparus aurata*): applicability in population genetics and pedigree analysis. *Aquaculture Research*, 41: 1514–1522.
- Pritchard, J. K., Stephens, M., and Donnelly, P. 2000. Inference of population structure using multilocus genotype data. *Genetics*, 155: 945–959.
- Raymond, M., and Rousset, F. 1995. Genepop (version-1.2)—Population genetics software for exact tests and ecumenicism. *Journal of Heredity*, 86: 248–249.
- Rice, W. R. 1989. Analyzing tables of statistical tests. *Evolution*, 43: 223–225.
- Rohlf, F. J. 2005. NTSYSpc. Numerical Taxonomy and Multivariate Analysis System. Exeter Software, New York.
- Rossi, A. R., Miggiano, M., Franchini, P., Perrone, E., Crosetti, D., and Sola, L. 2009. Genetic comparison of temporal replicates of gilthead sea bream (*Sparus aurata*) from two Tyrrhenian coastal lagoons characterized by different management. *Journal of Applied Ichthyology*, 25: 603–605.
- Rossi, A. R., Perrone, E., and Sola, L. 2006. Genetic structure of gilthead seabream, *Sparus aurata*, in the central Mediterranean Sea. *Central European Journal of Biology*, 1: 636–647.
- Ryman, N., and Palm, S. 2006. POWSIM: a computer program for assessing statistical power when testing for genetic differentiation. *Molecular Ecology Notes*, 6: 600–602.
- Sarropoulou, E., Franch, R., Louro, B., Power, D. M., Bargelloni, L., Magoulas, A., Senger, F., et al. 2007. A gene-based radiation hybrid map of the gilthead sea bream *Sparus aurata* refines and exploits conserved synteny with *Tetraodon nigroviridis*. *BMC Genomics*, 8. doi:10.1186/1471-2164-8-44.
- Sola, L., Moretti, A., Crosetti, D., Karaïskou, N., Magoulas, A., Rossi, A. R., Rye, M., et al. 2007. Gilthead seabream—*Sparus aurata*. In *Genetic Effects of Domestication, Culture and Breeding of Fish and Shellfish, and their Impacts on Wild Population*, pp. 47–54. Ed. by T. Svasand, D. Crosetti, E. Garcia-Vazquez, and E. Verspoor. Genimpact Final Scientific Report (EU contract n. RICA-CT-2005-022802). 176 pp.
- Teske, P. R., Forget, F. R. G., Cowley, P. D., von der Heyden, S., and Beheregaray, L. B. 2010. Connectivity between marine reserves and exploited areas in the philopatric reef fish *Chrysoblephus laticeps* (Teleostei: Sparidae). *Marine Biology*, 157: 2029–2042.
- Van Oosterhout, C., Hutchinson, W. F., Wills, D. P. M., and Shipley, P. 2004. MICRO-CHECKER: software for identifying and correcting genotyping errors in microsatellite data. *Molecular Ecology Notes*, 4: 535–538.
- Wang, J. 2001. A pseudo-likelihood method for estimating effective population size from temporally spaced samples. *Genetical Research*, 78: 243–257.
- Waples, R. S. 1989. A generalized approach for estimating effective population size from temporal changes in allele frequency. *Genetics*, 121: 379–391.
- Waples, R. S. 1998. Separating the wheat from the chaff: patterns of genetic differentiation in high gene flow species. *Journal of Heredity*, 89: 438–450.
- Weir, B. S., and Cockerham, C. C. 1984. Estimating *F*-statistics for the analysis of population structure. *Evolution*, 38: 1358–1370.
- Whittaker, J. C., Harbord, R. M., Boxall, N., Mackay, I., Dawson, G., and Sibly, R. M. 2003. Likelihood-based estimation of microsatellite mutation rates. *Genetics*, 164: 781–787.

Handling editor: Bill Turrell
